# Supplementary material for: SERS-active carboxymethyl cellulose-based gold nanoparticles: high-stability in hypersaline solution and selective response in the Hofmeister series
Source: Royal Society of Chemistry journal article supplement (doi:10.1039/c9nj01552c), 2019-01-01
Supplement: c9nj01552c1.pdf [file c9nj01552c1.pdf]

# New Journal of Chemistry

## Electronic Supplementary Information (ESI)

### **SERS-active carboxymethyl cellulose-based gold nanoparticles: High-stability in hypersaline solution and selective response in the Hofmeister series.**

Fernando Menegatti de Melo<sup>\*a</sup>, Allef Soares Fante<sup>b</sup>, Vitor de M. Zamarion<sup>a</sup>, Henrique Eisi Toma<sup>a</sup>

<sup>a</sup>*Department of Fundamental Chemistry, University of São Paulo, Av. Professor Lineu Prestes, 05508-000, São Paulo, Brazil.*

<sup>b</sup>*School of Pharmaceutical Sciences, University of São Paulo, Av. Professor Lineu Prestes, 05508-000, São Paulo, Brazil*

\*Corresponding author:

Fernando Menegatti de Melo, [fernando.menegatti.melo@usp.br](mailto:fernando.menegatti.melo@usp.br)

**Abstract:** Gold nanoparticles (AuNP) were directly synthesized with sodium carboxymethyl cellulose (CMC) by a simple one- pot procedure, exhibiting a surprising protection against salt-induced aggregation. The AuNP@CMC nanoparticles are reactive towards thiol ligands such as 4-mercaptopyridine (4MPy) and 2,4,6-trimercapto-1,3,5-triazine (TMT) indicating a labile character for the CMC coating. Aggregation can be promoted by those ligands combined with salt induced effects along Hofmeister series, allowing to explore the local enhanced electric fields (hot spots) in surface enhanced Raman (SERS) sensors. Such behavior is selective for the several salts within the Hofmeister series, exposing the role of the ligand exchange dynamics in the system.

**Keywords:** Gold nanoparticles, carboxymethyl cellulose, hypersaline solution, ligand exchange, SERS.



The first term describes the closed-shell repulsion of the occupied molecular orbitals of the reactants ( $q_a$  = is the electron population in atomic orbital  $a$ ;  $\beta_{ab}$ ,  $S_{ab}$  = resonance and overlap integrals for the interaction of atomic orbitals  $a$  and  $b$ ). The second term describes the Coulombic attraction or repulsion between the atoms of the reactants ( $Q_k$  = is the total charge on atom  $k$ , and  $R_{kl}$  is the local dielectric constant). Finally, the third term accounts for all possible interactions between the occupied and unoccupied molecular orbitals of the reactants ( $c_{ra}$  = the coefficient of atomic orbital  $a$  in molecular orbital  $r$ ;  $E_r$  = the energy of molecular orbital  $r$ ). Although conceptually useful, the Klopman equation seldom serves as the basis for energetic analysis in modern quantum chemical calculations. Because of the difference in MO energies appearing in the denominator of the third term, energetically close orbitals make the biggest contribution. Besides, analysis can often be simplified by considering only the highest occupied and lowest unoccupied molecular orbitals of the reactants (the HOMO-LUMO interaction in frontier molecular orbital theory, see in the next page). The relative contributions of the second and third terms play an important role in justifying hard soft acid base theory (HSAB), with hard-hard interactions governed by the ionic term and soft-soft interactions governed by the covalent term.<sup>1,2</sup>

### HOMO-LUMO theory

Generally speaking, HOMO and LUMO are types of molecular orbitals. The acronyms stand for *highest occupied molecular orbital* and *lowest unoccupied molecular orbital*, respectively as following schematic image shows. The energy difference between the HOMO and LUMO is termed the HOMO–LUMO gap ( $H_{Ho} - H_{Lu}$ ) and it can be used to predict the strength and stability of transition metal complexes.<sup>3</sup>

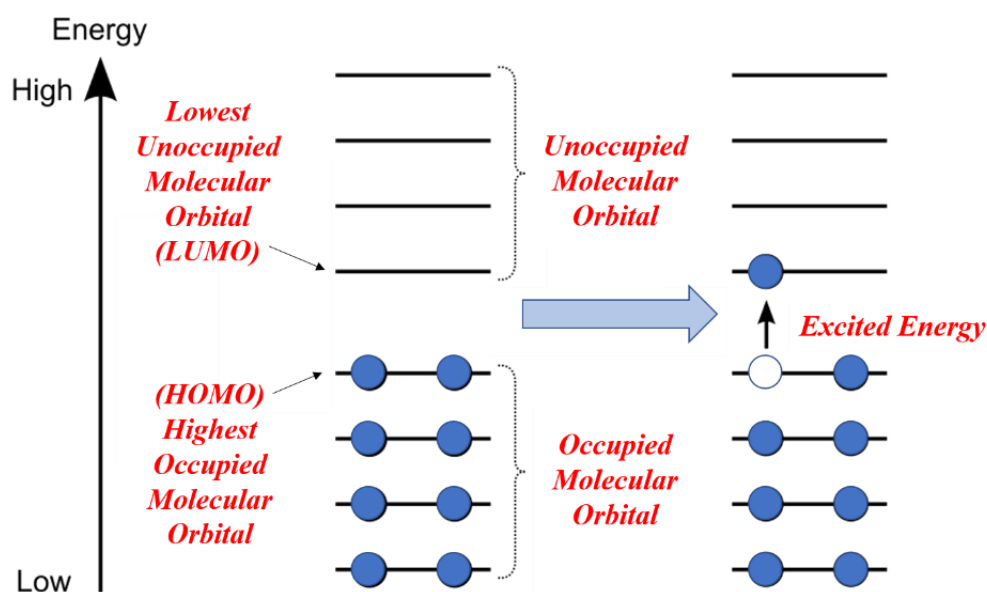

Figure S4. Diagram of the HOMO and LUMO of a general molecule. Each circle represents an electron in an orbital; When light is absorbed by an electron in the HOMO, it goes to the LUMO.

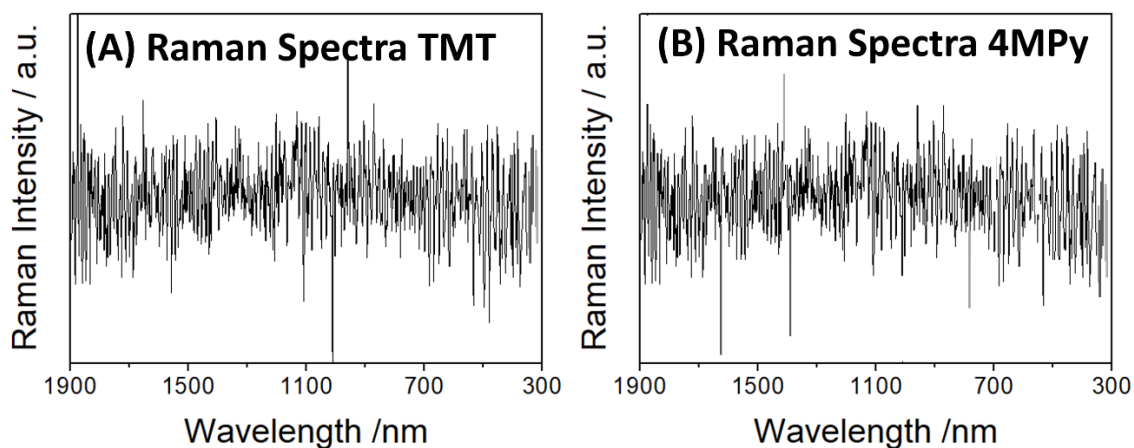

Figure S5. (A) Raman spectrum of TMT. (B) Raman spectrum of 4MPy. The studied ligands do not show any kind of Raman signal.

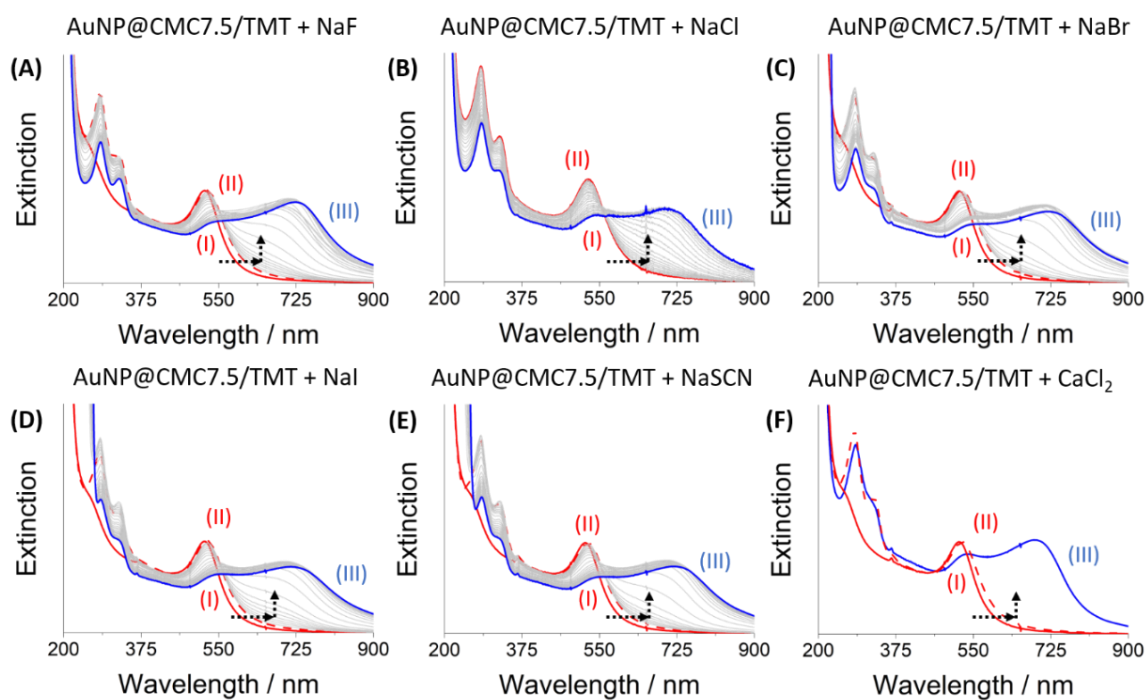

Figure S6. (A) SPR band before (I, solid red line) and after (II, dashed red line) adding TMT in the AuNP@CMC7.5 and after adding 500  $\mu\text{L}$  of NaF 4.0  $\text{mol}\cdot\text{L}^{-1}$  in the same system (III, blue line) proving the agglomeration process. (B-E) Same thing changing the salt (NaCl, NaBr, NaI and NaSCN). (F) In that system, it was not necessary to add 500  $\mu\text{L}$  of  $\text{CaCl}_2$ . After the first addition of that, the system was agglomerated.

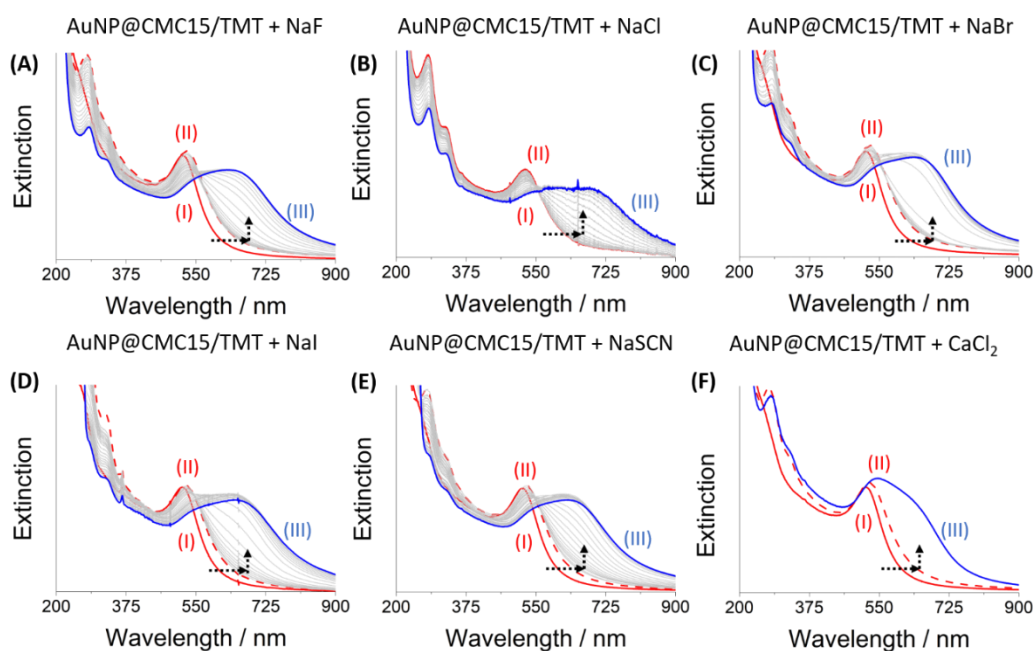

Figure S7. (A) SPR band before (I) and after (II) adding TMT in the AuNP@CMC7.5 and after adding 500  $\mu\text{L}$  of NaF 4.0 mol.L<sup>-1</sup> in the same system (III, blue line) proving the agglomeration process. (B-E) Same thing changing the salt (NaCl, NaBr, NaI and NaSCN). (F) In that system, it was not necessary to add 500  $\mu\text{L}$  of CaCl<sub>2</sub>. After the first addition of that, the system was agglomerated.

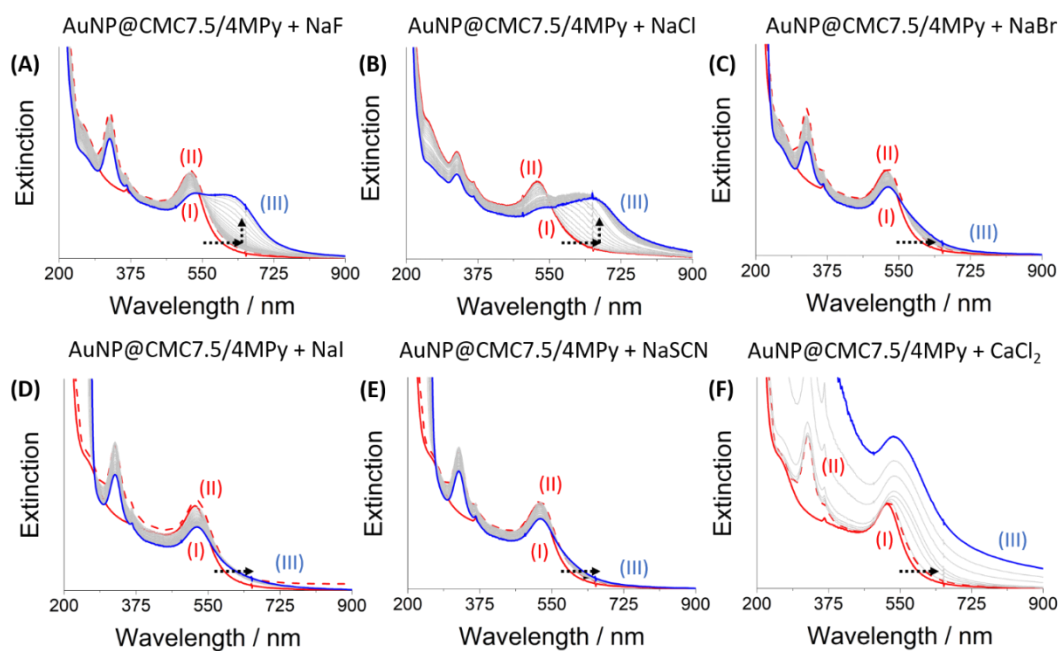

Figure S8. (A) SPR band before (I, solid red line) and after (II, dashed red line) adding 4MPy in the AuNP@CMC7.5 and after adding 500  $\mu\text{L}$  of NaF 4.0 mol.L<sup>-1</sup> in the same system (III, blue line) proving the agglomeration process. (B-E) Same thing changing the salt (NaCl, NaBr, NaI and NaSCN). (F) In that system, the baseline increasing disturbed our interpretation so we decided to add just six aliquots of CaCl<sub>2</sub> 4.0 mol.L<sup>-1</sup>.

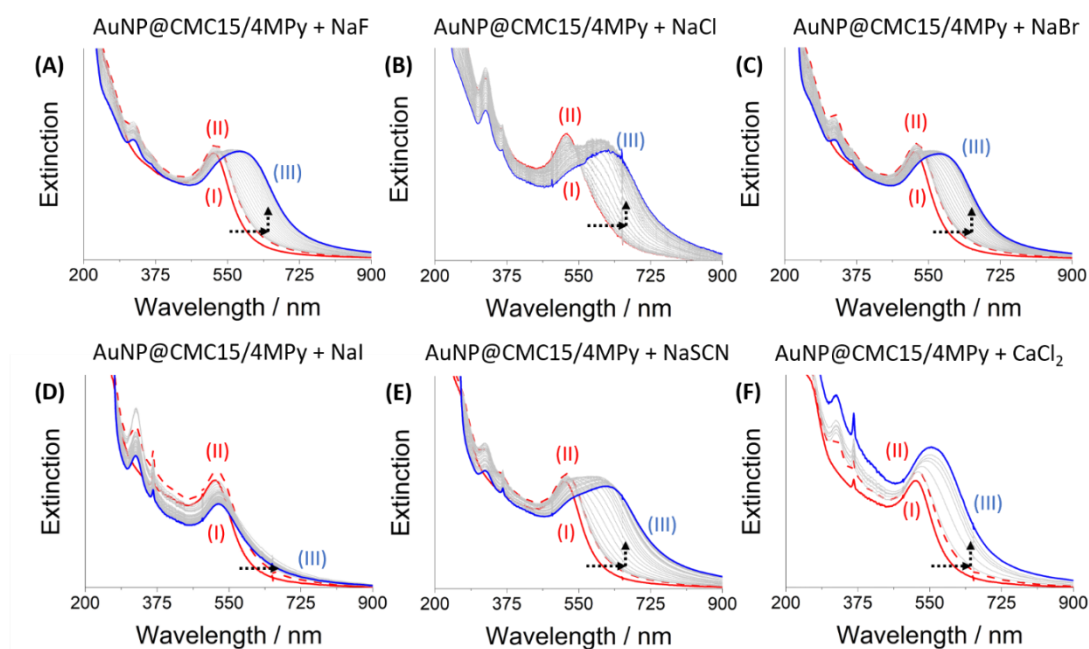

Figure S9. (A) SPR band before (I, solid red line) and after (II, dashed red line) adding 4MPy in the AuNP@CMC15 and after adding 500  $\mu\text{L}$  of NaF 2.0 mol.L<sup>-1</sup> in the same system (III, blue line) proving the agglomeration process. (B-E) Same thing changing the salt (NaCl, NaBr, NaI and NaSCN). (F) In that system, the baseline increasing disturbed our interpretation so we decided to add just six aliquots of CaCl<sub>2</sub> 4.0 mol.L<sup>-1</sup>.

## References

- 1 G. Klopman, *J. Am. Chem. Soc.*, 1968, 90(2), 223–234.
- 2 L. Salem, *J. Am. Chem. Soc.*, 1968, 90(3), 543-552.
3. J. S. Griffith and L.E. Orgel. *Q. Rev. Chem. Soc.* 1957, 11, 381-383.
